# Supplementary material
Source: publisher figshare collection journal article supplement (https://frontiersin.figshare.com/ndownloader/files/21922800)
Supplement: Supplementary file [file 21922800]

## Supplementary information

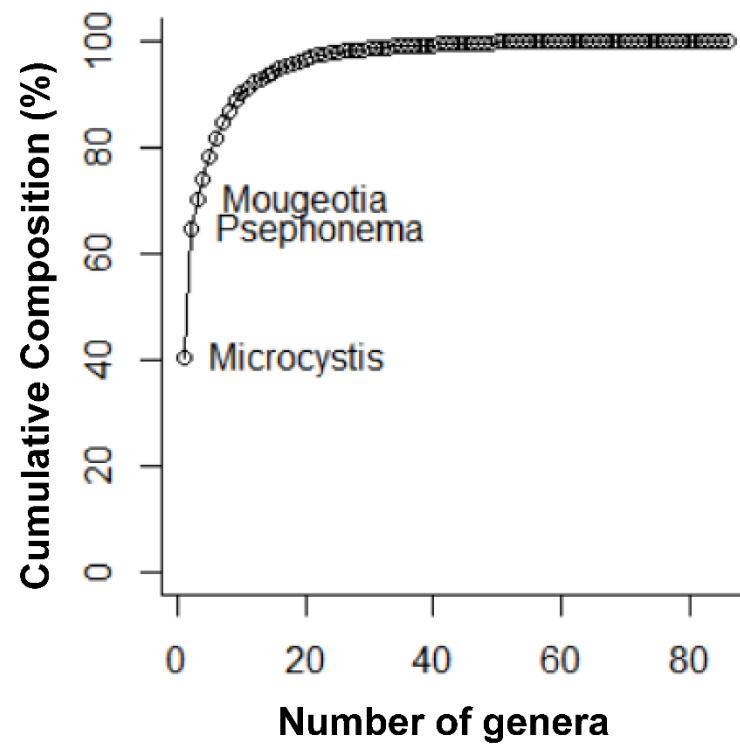

Figure S1. Accumulation curve of cell density of phytoplankton by all the genera. Genera are presented in descending order according to numbers of cells. Dominant genera, *Microcystis*, *Psephonema* and *Mougeotia* contributed more than 70% of the total numbers of cells.

(a) Cell density ( $\times 10^6$  cells  $L^{-1}$ )

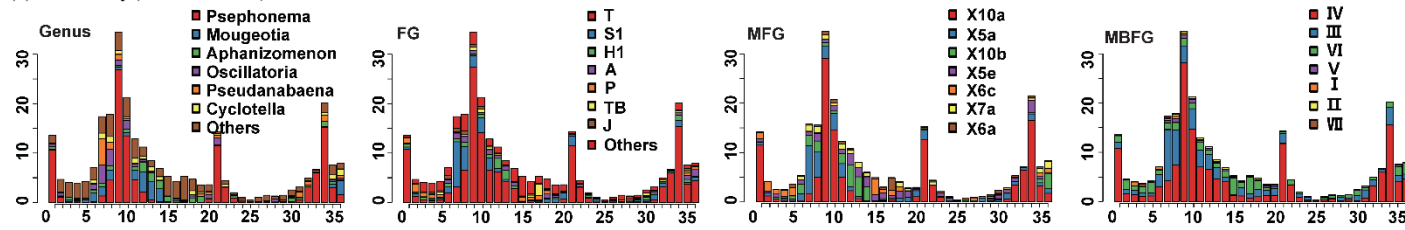

(b)  $\alpha$  diversity

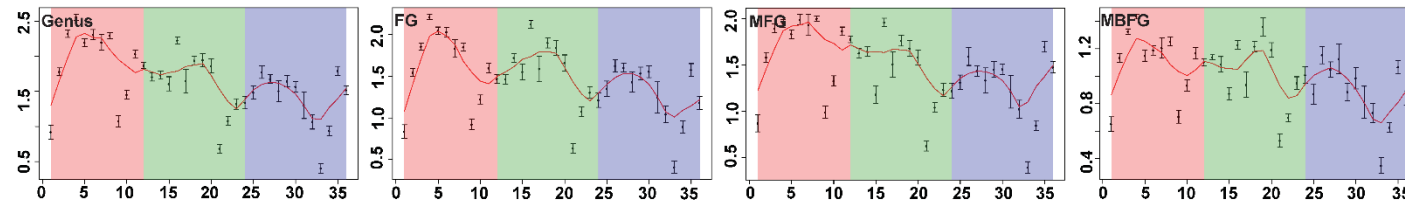

(c)  $\beta$  diversity

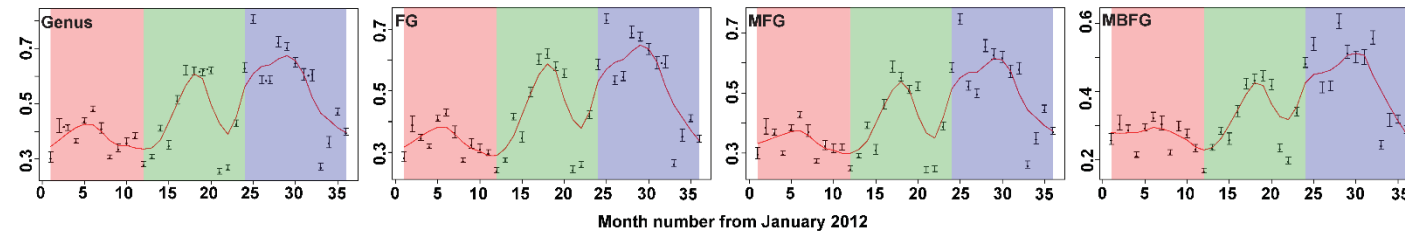

(d)  $\alpha$  diversity

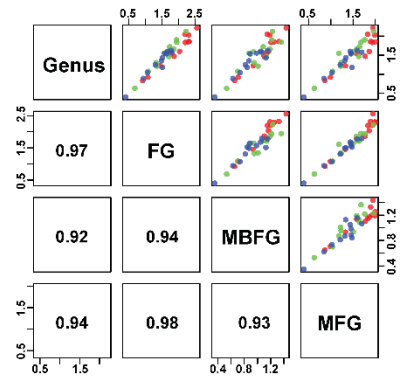

(e)  $\beta$  diversity

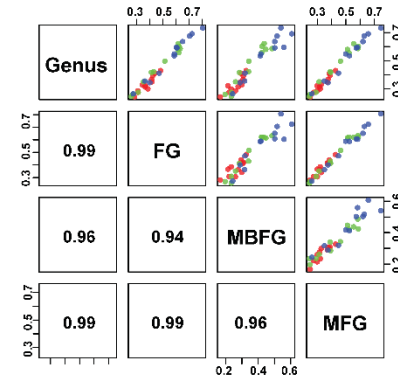

Figure S2. Seasonal composition and successions of phytoplankton in Lake Erhai from January 2012 to December 2014 according to taxonomic and 3 functional groupings, with removal of the dominant genus *Microcystis*. (a) Cell density and composition, (b) alpha diversity (Shannon-Wiener diversity) indices, (c) beta diversity (Bray-Curtis dissimilarity) indices, (d) pair plot for linear fitting of alpha and (e) beta diversity. The order from left to right is genus, functional groups (FG), morpho-functional groups (MFG) and morphology-based functional groups (MBFG). Numbers of cells are presented as the mean of the 15 sites for each month. Alpha and beta diversity values are presented as the mean  $\pm$  standard deviation (SD) among the 15 sites for each month. The numbers in the lower left columns in (d) and (e) are correlation coefficients ( $R^2$ ) ( $p < 0.05$ ).

(a) Cell density ( $\times 10^6$  cells  $L^{-1}$ )

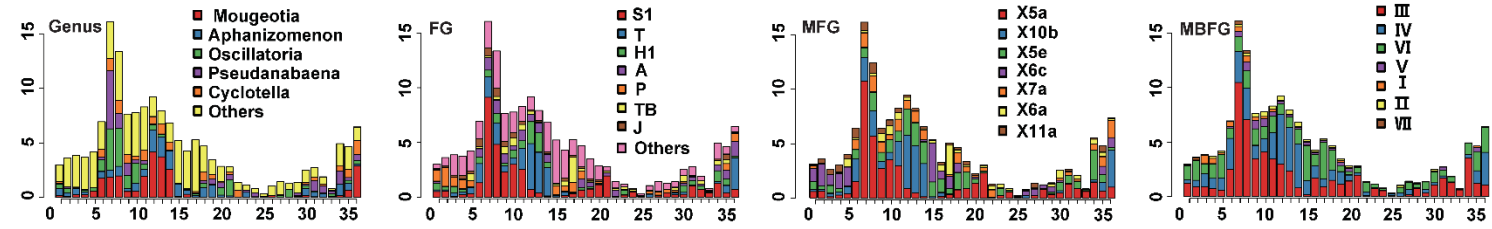

(b)  $\alpha$  diversity

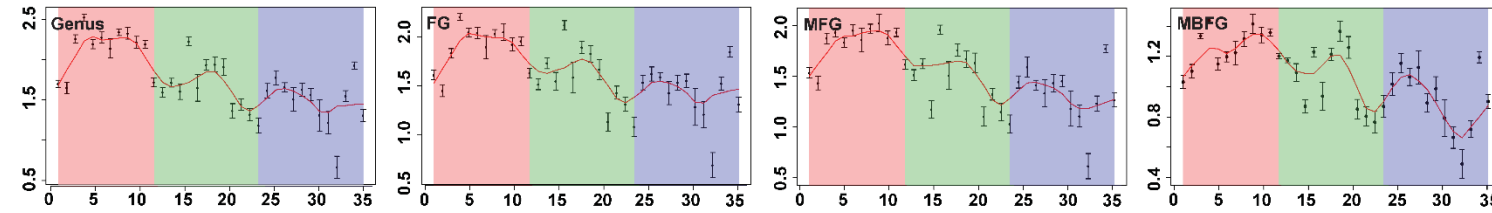

(c)  $\beta$  diversity

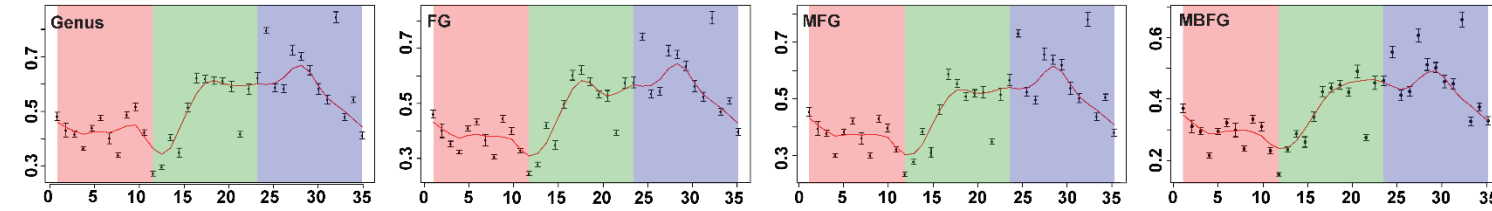

Month number from January 2012

(d)  $\alpha$  diversity

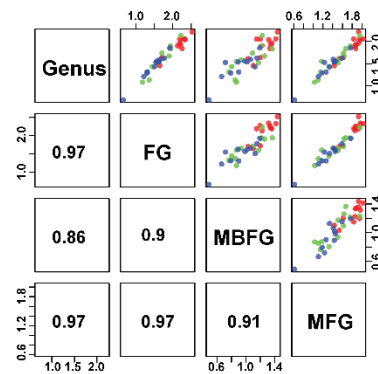

(e)  $\beta$  diversity

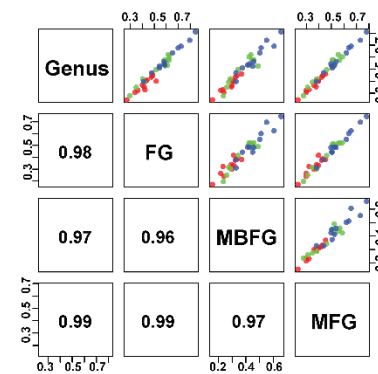

Figure S3. Seasonal composition and successions of phytoplankton in Lake Erhai from January 2012 to December 2014 according to taxonomic and 3 functional groupings, with removal of the dominant genera *Microcystis* and *Psephonema*. (a) Cell density and composition, (b) alpha diversity (Shannon-Wiener diversity) indices, (c) beta diversity (Bray-Curtis dissimilarity) indices, (d) pair plot for linear fitting of alpha and (e) beta diversity. The order from left to right is genus, functional groups (FG), morpho-functional groups (MFG) and morphology-based functional groups (MBFG). Numbers of cells are presented as the mean of the 15 sites for each month. Alpha and beta diversity values are presented as the mean  $\pm$  standard deviation (SD) among the 15 sites for each month. The numbers in the lower left columns in (d) and (e) are correlation coefficients ( $R^2$ ) ( $p < 0.05$ ).

(a) Cell density ( $\times 10^6$  cells  $L^{-1}$ )

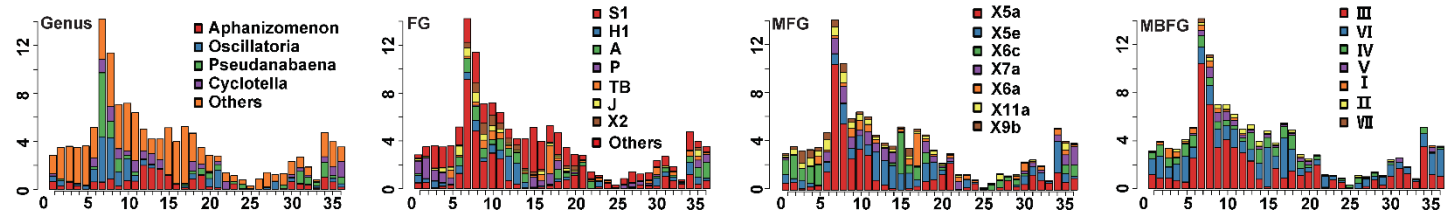

(b)  $\alpha$  diversity

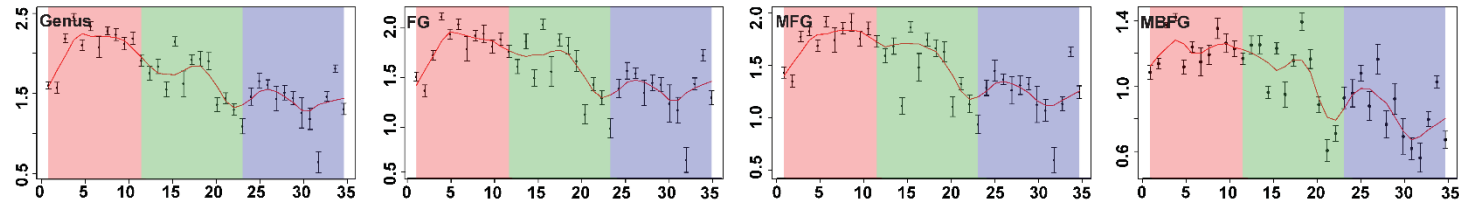

(c)  $\beta$  diversity

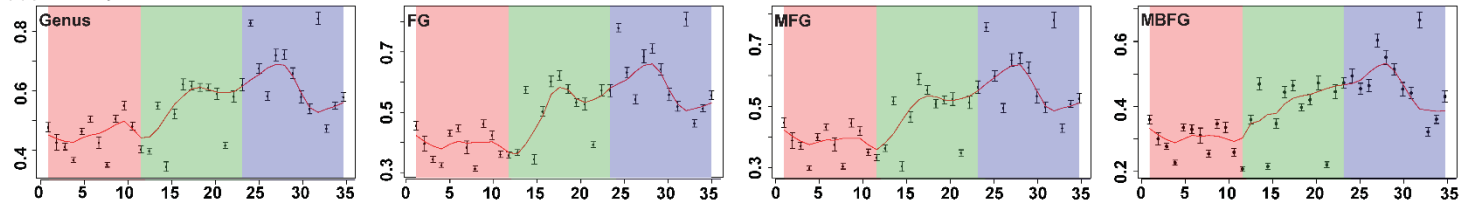

Month number from January 2012

(d)  $\alpha$  diversity

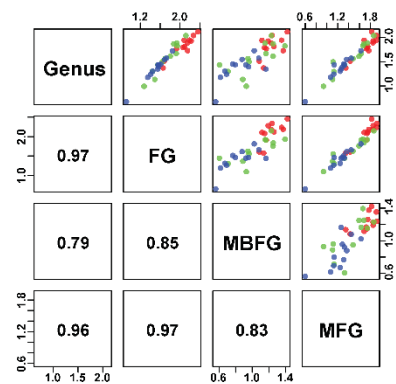

(e)  $\beta$  diversity

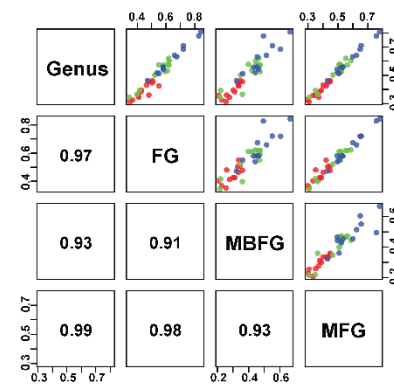

Figure S4. Seasonal composition and successions of phytoplankton in Lake Erhai from January 2012 to December 2014 according to taxonomic and 3 functional groupings, with removal of the dominant genera *Microcystis*, *Psephonema* and *Mougeotia*. (a) Cell density and composition, (b) alpha diversity (Shannon-Wiener diversity) indices, (c) beta diversity (Bray-Curtis dissimilarity) indices, (d) pair plot for linear fitting of alpha and (e) beta diversity. The order from left to right is genus, functional groups (FG), morpho-functional groups (MFG) and morphology-based functional groups (MBFG). Numbers of cells are presented as the mean of the 15 sites for each month. Alpha and beta diversity values are presented as the mean  $\pm$  standard deviation (SD) among the 15 sites for each month. The numbers in the lower left columns in (d) and (e) are correlation coefficients ( $R^2$ ) ( $p < 0.05$ ).

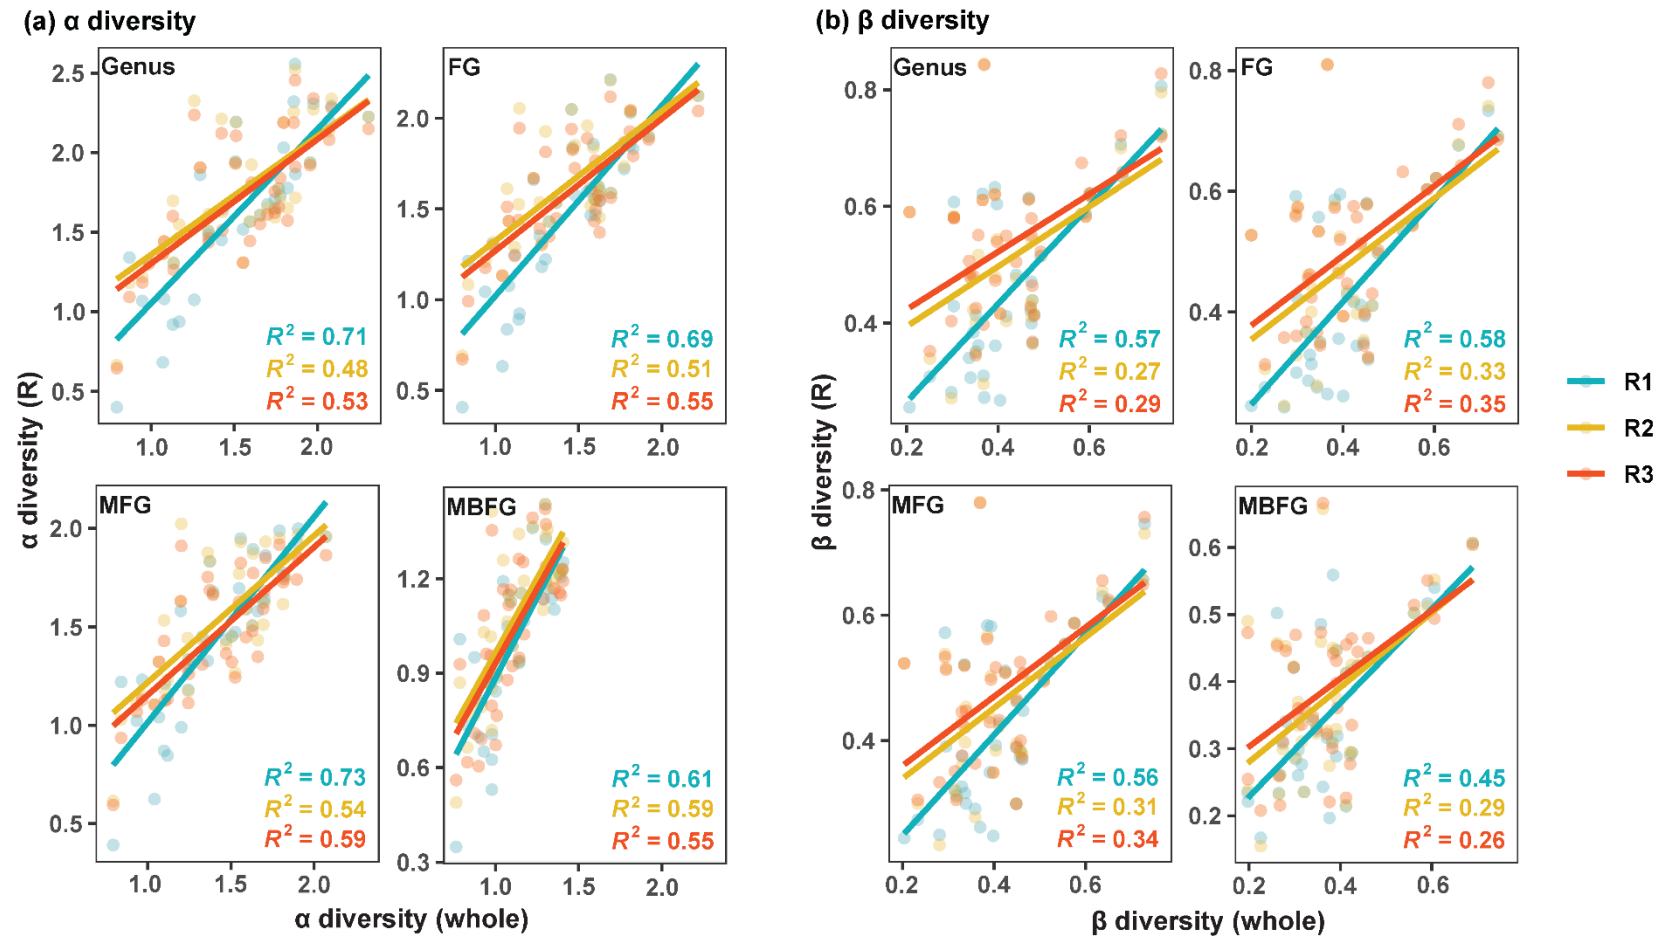

Figure S5. Correlation analyses presented as pair-wise scatter plots and linear regressions, for (a)  $\alpha$  diversity (Shannon-Wiener) and (b)  $\beta$  diversity (Bray-Curtis) indices of genus between the whole community and the remaining community (R) after the dominant genera *Microcystis*,



*Psephonema* and *Mougeotia* were removed gradually. R1: removal of *Microcystis*, R2: removal of *Microcystis* and *Psephonema*, R3: removal of *Microcystis*, *Psephonema* and *Mougeotia*. The numbers in the lower right are correlation coefficients ( $R^2$ ) ( $p < 0.001$ ).
